# Supplementary material for: Comparison of Fluid Replacement with Sterofundin ISO® vs. Deltajonin® in Infants Undergoing Craniofacial Surgery—A Retrospective Study
Source: MDPI journal article supplement (doi:10.3390/jcm12196404), 2023-10-08
Supplement: s1 [file s1]

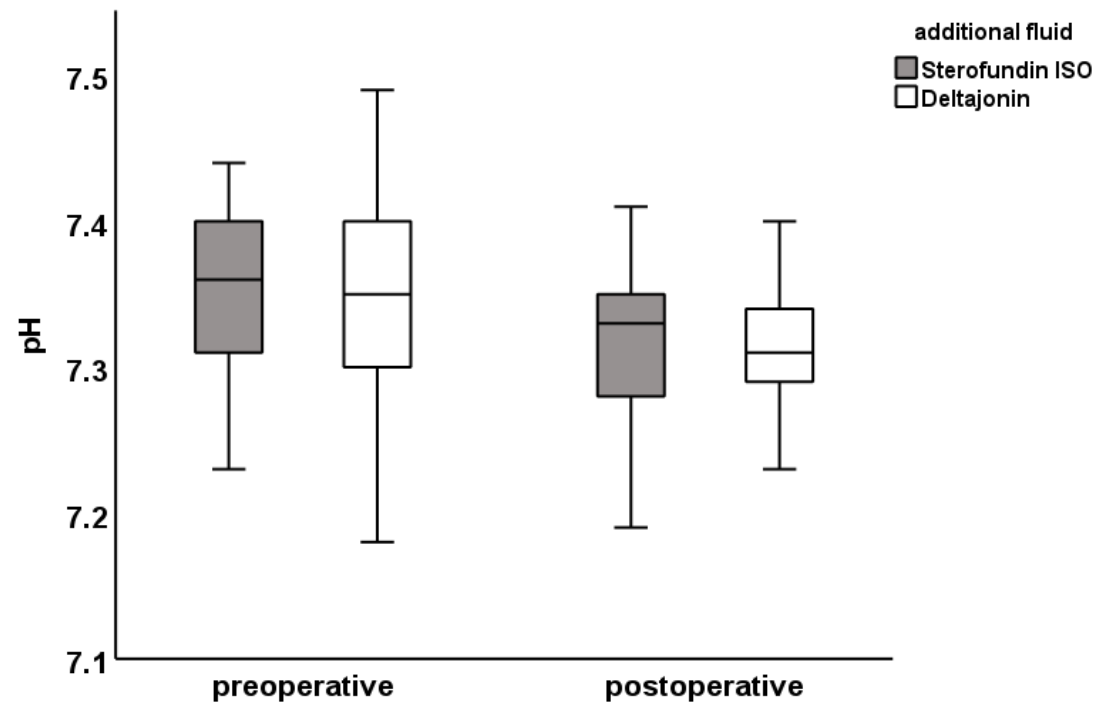

**Figure S1.** pH values pre- and postoperative. Blood samples were measured with an arterial blood gas analyzer right before and at the end of surgery. No Difference pre- or postoperative between Sterofundin ISO Group and Deltajonin Group; data are presented as mean  $\pm$  SD.

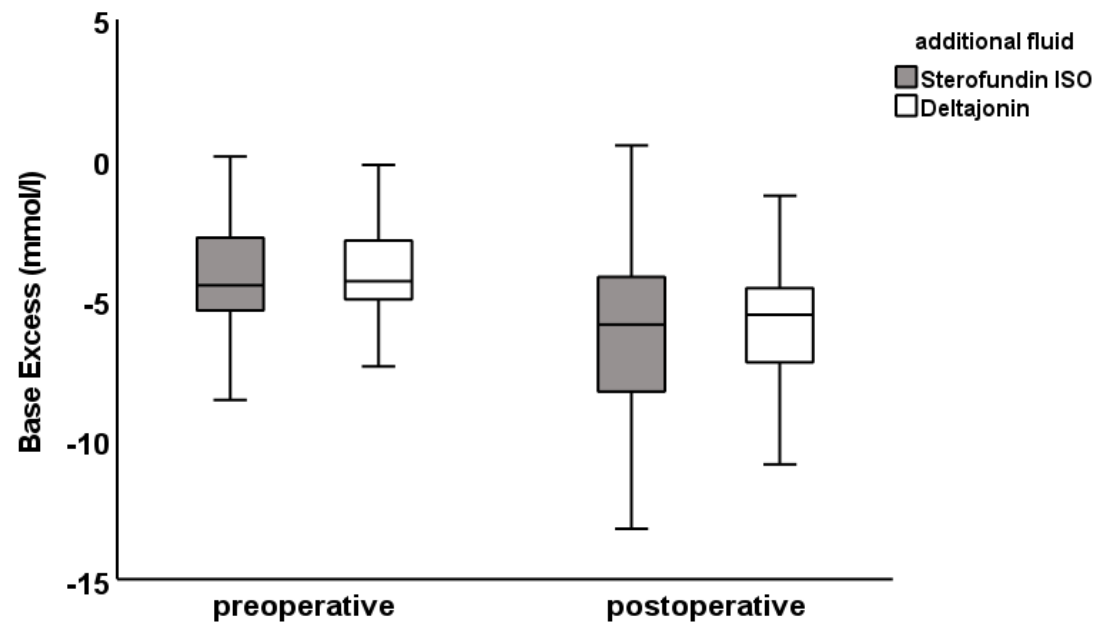

**Figure S2.** Base Excess values pre- and postoperative. Blood samples were measured with an arterial blood gas analyzer right before and at the end of surgery. No Difference pre- or postoperative between Sterofundin ISO Group and Deltajonin Group; data are presented as mean  $\pm$  SD.

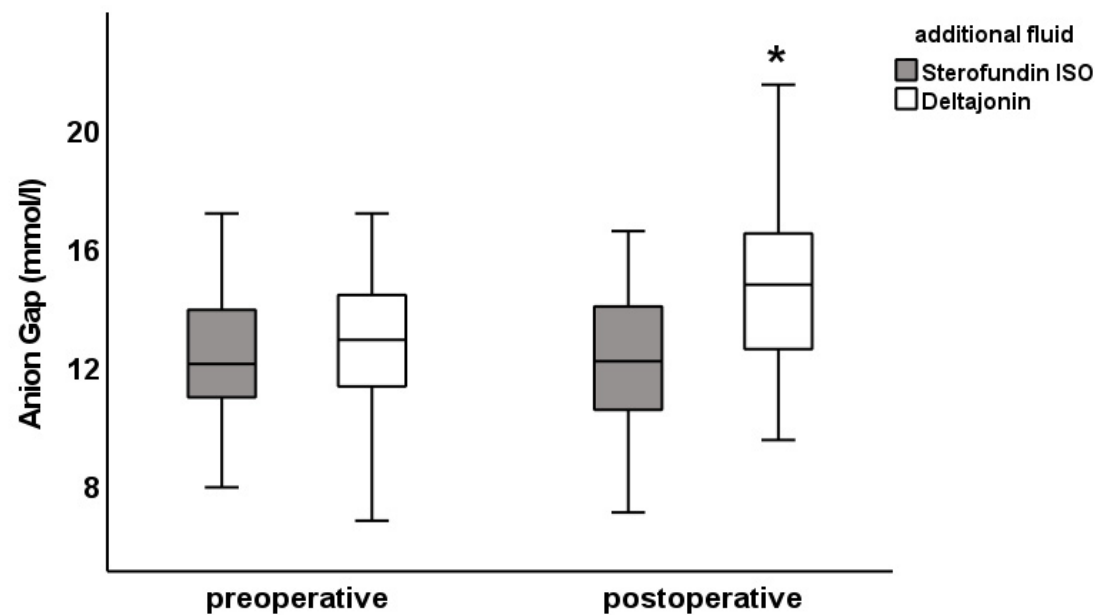

**Figure S3.** Anion Gap values pre- and postoperative. Anion Gap was calculated with  $[AG] = [Na^+] + [K^+] - [Cl^-] - [Bic^-]$ . Preoperative: Similar Anion Gap values. Postoperative: Difference between Sterofundin ISO Group and Deltajonin Group; data are presented as mean  $\pm$  SD; \*  $p < 0.05$  vs. Sterofundin ISO.

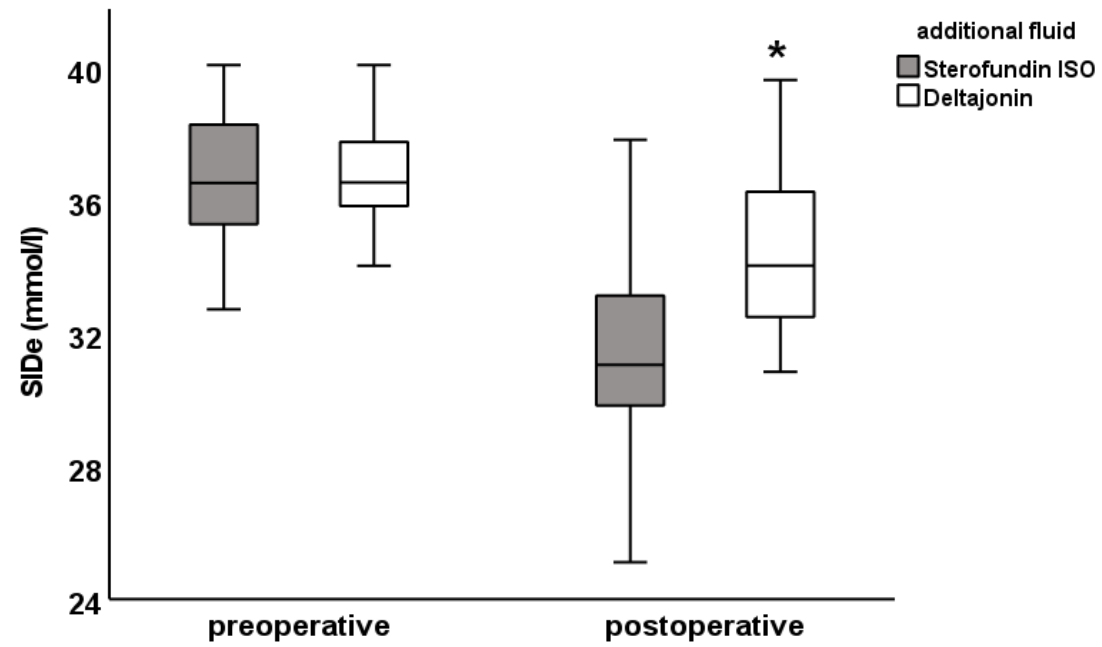

**Figure S4.** SDe values pre- and postoperative. SDe was calculated with  $[SDe] = [A^-] + [Bic]$ . Preoperative: Similar SDe values. Postoperative: Difference between Sterofundin ISO Group and Deltajonin Group; data are presented as mean  $\pm$  SD; \*  $p < 0.05$  vs. Sterofundin ISO.

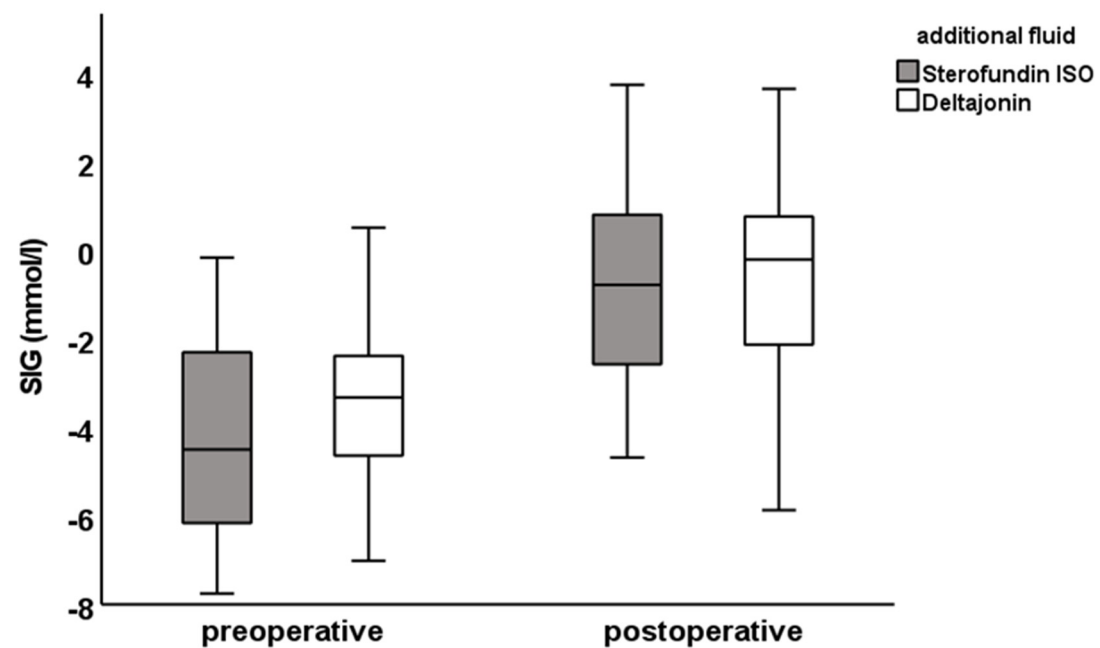

**Figure S5.** SIG values pre- and postoperative. SIG was calculated with  $[SIG]=[SIDa]-[SIDe]$ . No Difference pre- or postoperative between Sterofundin ISO Group and Deltajonin Group; data are presented as mean  $\pm$  SD.

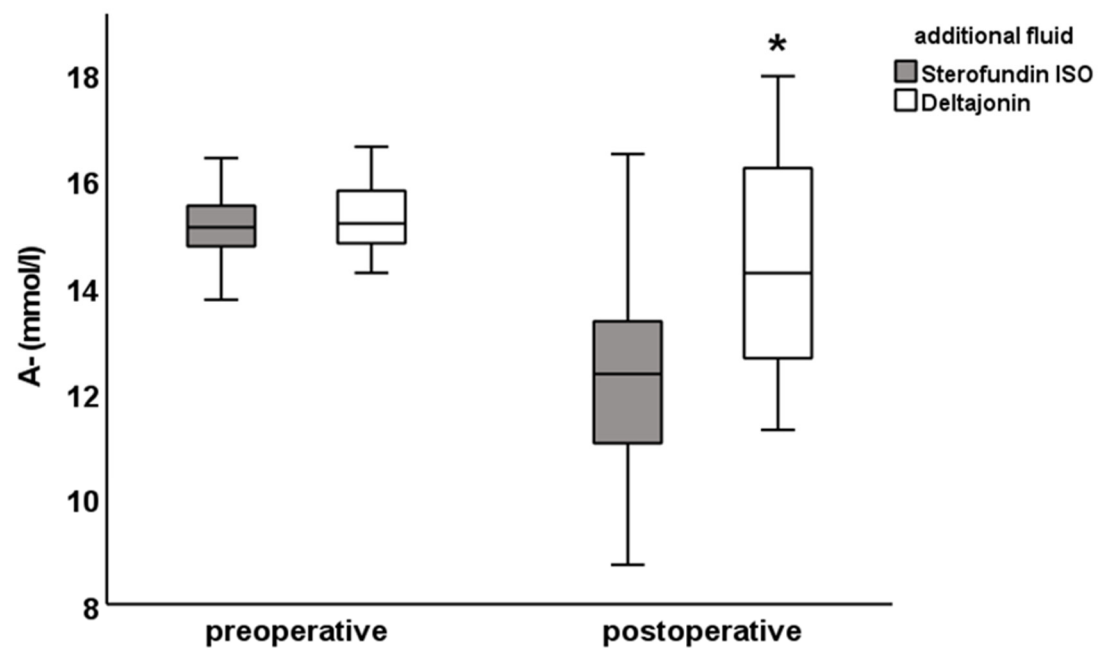

**Figure S6.** A- values pre- and postoperative. A- was calculated with  $[A-] = [\text{albumin} \times (0.123 \times \text{pH} - 0.631)] + [\text{phosphate} \times (0.309 \times \text{pH} - 0.469)]$ . Preoperative: Similar A- values. Postoperative: Difference between Sterofundin Iso Group and Deltajonin Group; data are presented as mean  $\pm$  SD; \*  $p < 0.05$  vs. Sterofundin Iso.

**Table S1.** Standard values.

|                                |                   |
|--------------------------------|-------------------|
| Na <sup>+</sup> -concentration | 135-145 mmol/L    |
| Cl <sup>-</sup> -concentration | 96-111 mmol/L     |
| K <sup>+</sup> -concentration  | 3.5-5.0 mmol/L    |
| Mg <sup>++</sup>               | 0.49-1.10 mmol/L  |
| Ca <sup>++</sup>               | 2.17-2.66 mmol/L  |
| Lactate                        | 5-20 mg/dL        |
| Albumin (s)                    | 37-51 g/L         |
| Hemoglobin                     | 11.1-14.3 g/dL    |
| Phosphate                      | 1.0-2.15 mmol/L   |
| pH arteriell                   | 7.37-7.45         |
| pCO <sub>2</sub>               | 35-45 mmHg        |
| Bicarbonate                    | 21-26 mmol/L      |
| Base Excess                    | -2 – 3 mmol/L     |
| Anionen Gap                    | 12 mmol/L         |
| SID <sub>a</sub>               | 40 bzw. 47 mmol/L |
| SID <sub>e</sub>               | 39 mmol/L         |
| A <sup>-</sup>                 | 15 mmol/L         |

**Table S2 Additional patient data.**

| ID | sex | age [months] | weight [kg] | duration of surgery [min] | ICU stay [days] | diagnosis                                    | surgical technique                                                      | infusion         |
|----|-----|--------------|-------------|---------------------------|-----------------|----------------------------------------------|-------------------------------------------------------------------------|------------------|
| 1  | m   | 9            | 9           | 195                       | 1               | Nonsyndromic Sagittal Craniosynostosis (NSC) | Modified pi-procedure                                                   | Sterofundin ISO® |
| 2  | f   | 8            | 7           | 90                        | 1               | Nonsyndromic Sagittal Craniosynostosis (NSC) | Extended strip craniectomy with parietal osteotomies ("barrel staving") | Sterofundin ISO® |
| 3  | m   | 6            | 9           | 90                        | 1               | Nonsyndromic Sagittal Craniosynostosis (NSC) | Extended strip craniectomy with parietal osteotomies ("barrel staving") | Sterofundin ISO® |
| 4  | m   | 5            | 6,2         | 105                       | 1               | Nonsyndromic Sagittal Craniosynostosis (NSC) | Extended strip craniectomy with parietal osteotomies ("barrel staving") | Sterofundin ISO® |
| 5  | m   | 11           | 9,5         | 100                       | 1               | Nonsyndromic Sagittal Craniosynostosis (NSC) | Modified pi-procedure                                                   | Sterofundin ISO® |
| 6  | m   | 6            | 6,8         | 90                        | 1               | Nonsyndromic Sagittal Craniosynostosis (NSC) | Extended strip craniectomy with parietal osteotomies ("barrel staving") | Sterofundin ISO® |
| 7  | m   | 15           | 8,5         | 70                        | 1               | Nonsyndromic Sagittal Craniosynostosis (NSC) | Modified pi-procedure                                                   | Sterofundin ISO® |
| 8  | f   | 6            | 8           | 120                       | 1               | Nonsyndromic Sagittal Craniosynostosis (NSC) | Extended strip craniectomy with parietal osteotomies ("barrel staving") | Sterofundin ISO® |
| 9  | m   | 5            | 8           | 120                       | 1               | Nonsyndromic Sagittal Craniosynostosis (NSC) | Extended strip craniectomy with parietal osteotomies ("barrel staving") | Sterofundin ISO® |
| 10 | m   | 4            | 7,5         | 90                        | 1               | Nonsyndromic Sagittal Craniosynostosis (NSC) | Extended strip craniectomy with parietal osteotomies ("barrel staving") | Sterofundin ISO® |
| 11 | m   | 6            | 9           | 120                       | 1               | Nonsyndromic Sagittal Craniosynostosis (NSC) | Extended strip craniectomy with parietal osteotomies ("barrel staving") | Sterofundin ISO® |
| 12 | m   | 7            | 7           | 100                       | 1               | Nonsyndromic Sagittal Craniosynostosis (NSC) | Extended strip craniectomy with parietal osteotomies ("barrel staving") | Sterofundin ISO® |
| 13 | m   | 4            | 6,5         | 90                        | 1               | Nonsyndromic Sagittal Craniosynostosis (NSC) | Extended strip craniectomy with parietal osteotomies ("barrel staving") | Sterofundin ISO® |
| 14 | m   | 6            | 6,5         | 180                       | 1               | Nonsyndromic Sagittal Craniosynostosis (NSC) | Extended strip craniectomy with parietal osteotomies ("barrel staving") | Sterofundin ISO® |
| 15 | m   | 5            | 7           | 120                       | 1               | Nonsyndromic Sagittal Craniosynostosis (NSC) | Extended strip craniectomy with parietal osteotomies ("barrel staving") | Sterofundin ISO® |
| 16 | m   | 5            | 7,4         | 150                       | 1               | Nonsyndromic Sagittal Craniosynostosis (NSC) | Modified pi-procedure                                                   | Sterofundin ISO® |
| 17 | m   | 8            | 9,2         | 120                       | 1               | Nonsyndromic Sagittal Craniosynostosis (NSC) | Extended strip craniectomy with parietal osteotomies ("barrel staving") | Sterofundin ISO® |
| 18 | m   | 6            | 8           | 120                       | 1               | Nonsyndromic Sagittal Craniosynostosis (NSC) | Extended strip craniectomy with parietal osteotomies ("barrel staving") | Sterofundin ISO® |
| 19 | f   | 5            | 5,7         | 120                       | 1               | Nonsyndromic Sagittal Craniosynostosis (NSC) | Extended strip craniectomy with parietal osteotomies ("barrel staving") | Sterofundin ISO® |
| 20 | f   | 6            | 8,9         | 120                       | 1               | Nonsyndromic Sagittal Craniosynostosis (NSC) | Extended strip craniectomy with parietal osteotomies ("barrel staving") | Sterofundin ISO® |
| 21 | m   | 4            | 7,3         | 100                       | 1               | Nonsyndromic Sagittal Craniosynostosis (NSC) | Extended strip craniectomy with parietal osteotomies ("barrel staving") | Sterofundin ISO® |
| 22 | m   | 5            | 7,1         | 130                       | 1               | Nonsyndromic Sagittal Craniosynostosis (NSC) | Extended strip craniectomy with parietal osteotomies ("barrel staving") | Sterofundin ISO® |
| 23 | f   | 5            | 8,2         | 120                       | 1               | Nonsyndromic Sagittal Craniosynostosis (NSC) | Extended strip craniectomy with parietal osteotomies ("barrel staving") | Sterofundin ISO® |
| 24 | m   | 5            | 9           | 135                       | 1               | Nonsyndromic Sagittal Craniosynostosis (NSC) | Extended strip craniectomy with parietal osteotomies ("barrel staving") | Sterofundin ISO® |
| 25 | f   | 14           | 10          | 135                       | 1               | Nonsyndromic Sagittal Craniosynostosis (NSC) | Modified pi-procedure                                                   | Sterofundin ISO® |
| 26 | f   | 7            | 7,3         | 120                       | 1               | Nonsyndromic Sagittal Craniosynostosis (NSC) | Extended strip craniectomy with parietal osteotomies ("barrel staving") | Sterofundin ISO® |
| 27 | m   | 4,5          | 9           | 90                        | 1               | Nonsyndromic Sagittal Craniosynostosis (NSC) | Extended strip craniectomy with parietal osteotomies ("barrel staving") | Sterofundin ISO® |
| 28 | m   | 6            | 6,7         | 115                       | 1               | Nonsyndromic Sagittal Craniosynostosis (NSC) | Extended strip craniectomy with parietal osteotomies ("barrel staving") | Sterofundin ISO® |
| 29 | f   | 5            | 7,1         | 120                       | 1               | Nonsyndromic Sagittal Craniosynostosis (NSC) | Extended strip craniectomy with parietal osteotomies ("barrel staving") | Sterofundin ISO® |
| 30 | f   | 6            | 8           | 85                        | 1               | Nonsyndromic Sagittal Craniosynostosis (NSC) | Extended strip craniectomy with parietal osteotomies ("barrel staving") | Sterofundin ISO® |
| 31 | f   | 5            | 7           | 85                        | 1               | Nonsyndromic Sagittal Craniosynostosis (NSC) | Extended strip craniectomy with parietal osteotomies ("barrel staving") | Sterofundin ISO® |
| 32 | m   | 4,5          | 6,1         | 90                        | 1               | Nonsyndromic Sagittal Craniosynostosis (NSC) | Extended strip craniectomy with parietal osteotomies ("barrel staving") | Sterofundin ISO® |
| 33 | f   | 5            | 7           | 90                        | 1               | Nonsyndromic Sagittal Craniosynostosis (NSC) | Extended strip craniectomy with parietal osteotomies ("barrel staving") | Sterofundin ISO® |
| 34 | f   | 6            | 8           | 90                        | 1               | Nonsyndromic Sagittal Craniosynostosis (NSC) | Extended strip craniectomy with parietal osteotomies ("barrel staving") | Sterofundin ISO® |
| 35 | m   | 22           | 12,5        | 150                       | 1               | Nonsyndromic Sagittal Craniosynostosis (NSC) | Modified pi-procedure                                                   | Sterofundin ISO® |
| 36 | m   | 4,5          | 5,8         | 80                        | 1               | Nonsyndromic Sagittal Craniosynostosis (NSC) | Extended strip craniectomy with parietal osteotomies ("barrel staving") | Sterofundin ISO® |
| 37 | m   | 12           | 9           | 90                        | 1               | Nonsyndromic Sagittal Craniosynostosis (NSC) | Modified pi-procedure                                                   | Sterofundin ISO® |
| 38 | f   | 10           | 9           | 135                       | 1               | Nonsyndromic Sagittal Craniosynostosis (NSC) | Modified pi-procedure                                                   | Sterofundin ISO® |
| 39 | m   | 5            | 8,2         | 90                        | 1               | Nonsyndromic Sagittal Craniosynostosis (NSC) | Extended strip craniectomy with parietal osteotomies ("barrel staving") | Sterofundin ISO® |
| 40 | f   | 5            | 7,9         | 70                        | 1               | Nonsyndromic Sagittal Craniosynostosis (NSC) | Extended strip craniectomy with parietal osteotomies ("barrel staving") | Sterofundin ISO® |
| 41 | f   | 9            | 8           | 115                       | 1               | Nonsyndromic Sagittal Craniosynostosis (NSC) | Extended strip craniectomy with parietal osteotomies ("barrel staving") | Sterofundin ISO® |
| 42 | m   | 7            | 7,7         | 90                        | 1               | Nonsyndromic Sagittal Craniosynostosis (NSC) | Extended strip craniectomy with parietal osteotomies ("barrel staving") | Sterofundin ISO® |
| 43 | f   | 6            | 7           | 80                        | 1               | Nonsyndromic Sagittal Craniosynostosis (NSC) | Extended strip craniectomy with parietal osteotomies ("barrel staving") | Sterofundin ISO® |
| 44 | m   | 7            | 8           | 90                        | 1               | Nonsyndromic Sagittal Craniosynostosis (NSC) | Extended strip craniectomy with parietal osteotomies ("barrel staving") | Sterofundin ISO® |
| 45 | m   | 7            | 8,1         | 110                       | 1               | Nonsyndromic Sagittal Craniosynostosis (NSC) | Extended strip craniectomy with parietal osteotomies ("barrel staving") | Sterofundin ISO® |
| 46 | f   | 7            | 7           | 90                        | 1               | Nonsyndromic Sagittal Craniosynostosis (NSC) | Extended strip craniectomy with parietal osteotomies ("barrel staving") | Sterofundin ISO® |
| 47 | m   | 5            | 7,1         | 70                        | 1               | Nonsyndromic Sagittal Craniosynostosis (NSC) | Extended strip craniectomy with parietal osteotomies ("barrel staving") | Sterofundin ISO® |
| 48 | m   | 4            | 6,9         | 60                        | 1               | Nonsyndromic Sagittal Craniosynostosis (NSC) | Extended strip craniectomy with parietal osteotomies ("barrel staving") | Sterofundin ISO® |
| 49 | m   | 7            | 9           | 190                       | 1               | Nonsyndromic Sagittal Craniosynostosis (NSC) | Extended strip craniectomy with parietal osteotomies ("barrel staving") | Sterofundin ISO® |
| 50 | m   | 5            | 7,7         | 90                        | 1               | Nonsyndromic Sagittal Craniosynostosis (NSC) | Extended strip craniectomy with parietal osteotomies ("barrel staving") | Sterofundin ISO® |
| 51 | m   | 5            | 8,5         | 120                       | 1               | Nonsyndromic Sagittal Craniosynostosis (NSC) | Extended strip craniectomy with parietal osteotomies ("barrel staving") | Deltajonin®      |
| 52 | f   | 9            | 7,5         | 90                        | 1               | Nonsyndromic Sagittal Craniosynostosis (NSC) | Modified pi-procedure                                                   | Deltajonin®      |
| 53 | m   | 7            | 8,6         | 89                        | 1               | Nonsyndromic Sagittal Craniosynostosis (NSC) | Extended strip craniectomy with parietal osteotomies ("barrel staving") | Deltajonin®      |
| 54 | m   | 14           | 10          | 180                       | 1               | Nonsyndromic Sagittal Craniosynostosis (NSC) | Modified pi-procedure                                                   | Deltajonin®      |
| 55 | m   | 4            | 7,5         | 60                        | 1               | Nonsyndromic Sagittal Craniosynostosis (NSC) | Extended strip craniectomy with parietal osteotomies ("barrel staving") | Deltajonin®      |



[illegible]
